# Supplementary material for: Extracellular Matrix Derived From Dental Pulp Stem Cells Promotes Mineralization
Source: Front Bioeng Biotechnol. 2022 Jan 27;9:740712. doi: 10.3389/fbioe.2021.740712 (PMC8829122; doi:10.3389/fbioe.2021.740712)
Supplement: Supplementary file 2 [file Table2.XLSX]

## Sheet: DPSC ECM Signature
	2.2 Supplementary Table 2. Matrisome signature proteins of ECM derived from DPSCs and the significant ECM proteins in normal and osteogenic differentiation conditions
	DPSCs ECM Signature	Core Matrisome	Collagens	Beaded	COL6A1	COL6A2	COL6A3
				FACIT	COL12A1	COL14A1	COL16A1	COL22A1
				Fobril Forming	COL1A1	COL1A2	COL2A1	COL3A1	COL5A1	COL5A2	COL5A3
				Membrane	COL4A1	COL4A2	COL4A3	COL15A1	COL17A1	COL18A1
				Network	COL8A1
			Glycoproteins	CCN	CCN1	CCN2
				Elastic fibres	EMILIN1	EMILIN2	FBN1	FBN2	MFAP1	MFAP2	MFAP4
				Fibulin	EFEMP1	EFEMP2	FBLN1	FBLN2	FBLN5	HMCN1
				GF binding	IGFBP2	IGFBP4	IGFBP5	IGFBP7	LTBP1	LTBP2	LTBP4	LTBP3
				Hemostasis	FGB	FGG	VTN
				Laminin	LAMA1	LAMA2	LAMA3	LAMA4	LAMA5	LAMB1	LAMB2	LAMC1
				Major	ECM1	FN1	MXRA5	TNC
				Membrane	AGRN	NID1	NID2
				Unclassified	CRELD2	POSTN	TGFBI	THSD4
			Proteoglycans	Hyalectan Lectican	VCAN
				Pericellular	HSPG2
				SLRP 1	BGN	DCN
				SLRP 2	FMOD	LUM
				SLRP 3	OGN
				Unclassified	HAPLN1	PRG4
	DPSCs ECM Signature	Matrisome Associated	Regulators	Cathepsin	CTSA	CTSB	CTSC	CTSD	CTSK	CTSL	CTSS	CTSZ
				Collagen related	LEPRE1	LEPREL2	LOXL1	LOXL2	PLOD1	PLOD2	PLOD3	LOX
					LOXL3	P4HA1	P4HA2	P4HA3
				Cystatin	CST3	CSTB
				Hemostasis	F2	F10	F13A1	PLAT	PLAU
				Major	TIMP1	TIMP2	TIMP3
				Metallo peptidases	ADAM17	ADAMTSL1	ADAMTSL4	MMP2	MMP14	ADAM9	ADAM10	ADAM15
					ADAMTS16	ADAMTSL5
				Serpin	SERPINA6	SERPINB1	SERPINB5	SERPINB6	SERPINB8	SERPINE1	SERPINE2	SERPINF1
					SERPINH1
				Sulphatase	HYAL2
				Unclassified	ITIH3
			Affiliated Proteins	Annexin	ANXA1	ANXA2	ANXA3	ANXA4	ANXA5	ANXA6	ANXA7	ANXA11
				C1Q	C1QTNF5
				Galectin	LGALS1	LGALS3	LGALS8
				Glypican	GPC1	GPC6
				Lectin	CLEC11A	COLEC12
				Mucin	MUC5B
				Plexin	PLXNA1	PLXNA4	PLXNB1	PLXNB2	PLXDC1	PLXDC2	PLXND1
				SEMA	SEMA3A	SEMA3C
				Syndecan	SDC1	SDC2	SDC4
				Unclassified	CSPG4	GREM1	LMAN1
			Secreted Factors	Angiopoietin	ANGPT1	ANGPTL2
				Chemokine	CXCL6	CXCL12
				FGF	FGF2
				GDF	GDF15
				Interleukin	IL25
				S100CaBP	S100A4	S100A6	S100A10	S100A11	S100A13	S100A16
				Unclassified	CCBE1	FST	FSTL1	HCFC1	HGF	IGF2	INHBA	MDK
					PTN	SFRP1	TGFB1	TGFB2	ZFP91
				Wnt	WNT5A	WNT5B	WNT16
